# Supplementary material
Source: PubMed Central journal article supplement (PMC4298831)
Supplement: NIHMS634078-supplement.pdf [file NIHMS634078-supplement.pdf]

## Supplemental Tables

**Table 1:** Patient Characteristics

| <b>Characteristic</b>     | <b>Number/Description</b> |
|---------------------------|---------------------------|
| All Patients              | 54                        |
| <b>Age</b>                |                           |
| Median (range)            | 3.1 yrs (0.6-15.6 yrs)    |
| <b>Sex</b>                |                           |
| Male                      | 52 (48%)                  |
| <b>Group</b>              |                           |
| I                         | 1 (2%)                    |
| II                        | 7 (13%)                   |
| III                       | 44 (81%)                  |
| IV                        | 2 (4%)                    |
| <b>Stage</b>              |                           |
| 1                         | 16 (30%)                  |
| 2                         | 14 (26%)                  |
| 3                         | 22 (40%)                  |
| 4                         | 2 (4%)                    |
| <b>Histology</b>          |                           |
| Embryonal/Botryoid        | 40 (74%)                  |
| Alveolar/Undifferentiated | 14 (26%)                  |
| <b>Risk Group</b>         |                           |
| Low                       | 14 (26%)                  |
| Intermediate              | 38 (70%)                  |
| High                      | 2 (4%)                    |
| <b>Site</b>               |                           |
| <i>Favorable</i>          | <i>18 (33%)</i>           |
| Orbital                   | 12 (21%)                  |
| Head & Neck               | 3 (6%)                    |
| Perineal/perianal region  | 2 (4%)                    |
| Biliary                   | 1 (2%)                    |
| <i>Unfavorable</i>        | <i>36 (67%)</i>           |
| Parameningeal (PM)        | 24 (44%)                  |
| Bladder/prostate          | 7 (13%)                   |
| Extremities               | 3 (6%)                    |
| Chest/abdomen             | 2 (4%)                    |
| <b>Size</b>               |                           |
| ≤ 5 cm                    | 32 (60%)                  |
| > 5 cm                    | 22 (40%)                  |
| <b>Nodal Disease</b>      |                           |
| N0                        | 48 (89%)                  |
| N1                        | 6 (11%)                   |
| <b>Radiation Dose</b>     |                           |
| Median (Range)            | 50.4 Gy (36-50.4 Gy)      |
| <b>Number of Beams</b>    |                           |
| Proton Median (Range)     | 3 (1-7)                   |
| Photon Median (Range)     | 7 (4-9)                   |

**Table 2:** OAR doses for the single chest primary

| Chest                           |           | Left Shoulder Primary (n=1) |      |          |
|---------------------------------|-----------|-----------------------------|------|----------|
| Structure                       | Dose      | Proton                      | IMRT | % Spared |
| Brachial Plexus <sub>ipsi</sub> | Mean (Gy) | 45                          | 51   | 12       |
|                                 | V50 (%)   | 50                          | 83   | 40       |
| Humerus <sub>ipsi</sub>         | Mean (Gy) | 37                          | 43   | 14       |
|                                 | V50 (%)   | 0                           | 26   | 100      |
| Lung <sub>ipsi</sub>            | Mean (Gy) | 9                           | 15   | 40       |
|                                 | V5 (%)    | 44                          | 68   | 35       |
|                                 | V20 (%)   | 20                          | 28   | 29       |
| Breast <sub>ipsi</sub>          | Mean (Gy) | 1                           | 3    | 67       |
|                                 | V5 (%)    | 9                           | 20   | 55       |
| Heart                           | Mean (Gy) | 0.1                         | 3    | 97       |
| Left Ventricle                  | Mean (Gy) | 0                           | 1    | 100      |
| Esophagus                       | Mean (Gy) | 10                          | 12   | 17       |
|                                 | V20 (%)   | 29                          | 31   | 6        |
| Thyroid                         | Mean (Gy) | 20                          | 22   | 9        |
|                                 | V30 (%)   | 42                          | 45   | 7        |
| Skin                            | DMax (Gy) | 52                          | 54   | 4        |

**Table 3:** OAR doses for abdominal primaries

| Abdomen                  |           | Biliary (n=1) |      |          | Left Paraspinal (n=1) |      |          |
|--------------------------|-----------|---------------|------|----------|-----------------------|------|----------|
| Structure                | Dose      | Proton        | IMRT | % Spared | Proton                | IMRT | % Spared |
| Kidney <sub>Ipsi</sub>   | Mean (Gy) | 7             | 14   | 50       | 18                    | 36   | 50       |
|                          | V20 (%)   | 9             | 15   | 40       | 47                    | 89   | 47       |
|                          | V30 (%)   | 3             | 3    | 0        | 34                    | 72   | 53       |
| Kidney <sub>Contra</sub> | Mean (Gy) | 2             | 6    | 67       | 0                     | 11   | 100      |
| Stomach                  | Mean (Gy) | 8             | 11   | 27       | 0                     | 8    | 100      |
|                          | V20 (%)   | 1             | 9    | 89       | 0                     | 0    | 0        |
| Small Bowel              | Mean (Gy) | 6             | 6    | 0        | 5                     | 23   | 78       |
|                          | V45 (%)   | 1             | 0    | -100     | 1                     | 3    | 67       |
| Liver                    | Mean (Gy) | 15            | 16   | 6        | 0                     | 4    | 100      |
|                          | V20 (%)   | 29            | 30   | 3        | 0                     | 0    | 0        |
| Pancreas                 | Mean (Gy) | 21            | 15   | -29      | 0                     | 20   | 100      |
|                          | V20 (%)   | 31            | 16   | -48      | 0                     | 48   | 100      |
| Pelvic Bones             | Mean (Gy) | --            | --   | --       | 5                     | 9    | 44       |
|                          | V20 (%)   | --            | --   | --       | 10                    | 19   | 47       |
| Heart                    | Mean (Gy) | 0             | 1    | 100      | --                    | --   | --       |
| Lt Ventricle             | Mean (Gy) | 0             | 1    | 100      | --                    | --   | --       |
| Skin                     | DMax (Gy) | 17            | 11   | -35      | 40                    | 35   | -13      |

**Table 4:** OAR doses for the pelvic primaries

| Pelvis        |           | Prostate/Bladder, Perineal, Perianal, Extremity (n=12) |      |          |         |
|---------------|-----------|--------------------------------------------------------|------|----------|---------|
| Structure     | Dose      | Proton                                                 | IMRT | % Spared | P Value |
| Bladder       | Mean (Gy) | 22                                                     | 26   | 15       | 0.02    |
|               | V30 (%)   | 41                                                     | 48   | 15       | 0.08    |
| Cauda         | Mean (Gy) | 2                                                      | 5    | 60       | 0.02    |
|               | V20 (%)   | 3                                                      | 11   | 73       | 0.05    |
| Small Bowel   | Mean (Gy) | 1                                                      | 3    | 67       | 0.07    |
|               | V45 (%)   | 0                                                      | 0    | 0        | 0.35    |
| Large Bowel   | Mean (Gy) | 7                                                      | 11   | 36       | 0.01    |
|               | V45 (%)   | 7                                                      | 7    | 0        | 0.8     |
| Pelvic Bones  | Mean (Gy) | 11                                                     | 16   | 31       | <0.01   |
|               | V20 (%)   | 23                                                     | 27   | 15       | 0.02    |
|               | V30 (%)   | 18                                                     | 38   | 53       | <0.01   |
| Growth Plates | Mean (Gy) | 11                                                     | 19   | 42       | <0.01   |
|               | V30 (%)   | 14                                                     | 26   | 46       | <0.01   |
| Femoral Head  | Mean (Gy) | 6                                                      | 13   | 54       | <0.01   |
|               | V30 (%)   | 3                                                      | 12   | 75       | 0.02    |
| Rectum        | Mean (Gy) | 25                                                     | 30   | 17       | 0.04    |
|               | V45 (%)   | 25                                                     | 32   | 22       | 0.09    |
| Anus          | Mean (Gy) | 19                                                     | 26   | 27       | 0.02    |
|               | V40 (%)   | 36                                                     | 40   | 10       | 0.31    |
| Testes        | Mean (Gy) | 1                                                      | 7    | 86       | 0.01    |
|               | V5 (%)    | 8                                                      | 48   | 83       | 0.01    |
| Uterus        | Mean (Gy) | 9                                                      | 16   | 44       | 0.27    |
|               | V20 (%)   | 25                                                     | 41   | 39       | 0.39    |
| Vagina        | Mean (Gy) | 8                                                      | 20   | 60       | 0.05    |
|               | V40 (%)   | 2                                                      | 11   | 82       | 0.08    |
| Ovaries       | Mean (Gy) | 2                                                      | 11   | 82       | 0.01    |
|               | V5 (%)    | 16                                                     | 62   | 74       | 0.03    |
| Penile Bulb   | Mean (Gy) | 31                                                     | 39   | 21       | 0.05    |
|               | V20 (%)   | 70                                                     | 85   | 18       | 0.07    |
| Skin          | DMax (Gy) | 33                                                     | 31   | -6       | 0.26    |
